# Supplementary material for: Did Patients With COVID-19 Receive Timely Treatment in the Early Epidemic? A Systematic Review and Meta-analysis
Source: Research Square preprint supplement (doi:10.21203/rs.3.rs-514728/v1), 2021-05-26
Supplement: Supplementary file 1 [file 78ebaddb763d0bb2591710df.docx]

**Supplementary III**

**GRADE evidence profile**

**Table** Summary of findings

| Outcomes | No.of  studies | Sample  size | Certainty assessment | | | | | MD (95% CI) | Certainty |
| --- | --- | --- | --- | --- | --- | --- | --- | --- | --- |
| Risk of bias | Inconsistency | Indirectness | Imprecision | Other considerations |
| Duration from symptom onset to first medical visit of the common patients and severe patients | 6 | 1376 | Serious1 | Not serious | Not serious | Not serious | None | -1.25(-1.71,-0.80) | ⊕〇〇〇  VERY LOW |
| Duration from symptom onset to admission of  the common patients and severe patients | 7 | 1593 | Serious1 | Not serious | Not serious | Not serious | None | -1.92(-2.55,-1.30) | ⊕〇〇〇  VERY LOW |

1, downgrade one level: the risk of bias is high due to the limitations of study design.
