# Supplementary material for: Did Patients With COVID-19 Receive Timely Treatment in the Early Epidemic? A Systematic Review and Meta-analysis
Source: Research Square preprint supplement (doi:10.21203/rs.3.rs-514728/v1), 2021-05-26
Supplement: Supplementary file 2 [file 894250fc360f721523fbf7cd.docx]

**Supplementary III**

**Risk of bias in the included studies**

**Table S1** Case series

| Study ID | Item 1 | Item 2 | Item 3 | Item 4 | Item 5 | Item 6 | Item 7 | Item 8 | Scores†† |
| --- | --- | --- | --- | --- | --- | --- | --- | --- | --- |
| Gao 2020 (26) | Yes | Yes | Yes | Yes | No | Yes | Yes | No | 6 |
| Fu 2020 (27) | No | Yes | Yes | Yes | No | Yes | Yes | Yes | 6 |
| liu 2020 (28) | No | Yes | No | Yes | No | Yes | Yes | Yes | 5 |
| Liu 2020 (29) | No | Yes | Yes | Yes | No | Yes | Yes | Yes | 6 |
| Huang 2020 (30) | No | Yes | Yes | Yes | No | Yes | Yes | Yes | 7 |
| Liu 2020 (31) | No | Yes | Yes | Yes | No | Yes | Yes | Yes | 6 |
| Liu 2020 (32) | No | No | No | Yes | No | Yes | Yes | No | 3 |
| Han 2020 (33) | Yes | Yes | No | No | No | No | Yes | No | 3 |
| Yu 2020 (34) | No | Yes | Yes | Yes | No | Yes | Yes | Yes | 6 |
| Xia 2020 (35) | No | Yes | Yes | Yes | No | Yes | Yes | Yes | 6 |
| Chen 2020 (36) | Yes | Yes | Yes | Yes | No | Yes | Yes | Yes | 7 |
| Ye 2020 (37) | No | Yes | Yes | Yes | No | Yes | Yes | Yes | 6 |
| Yang 2020 (38) | No | Yes | Yes | Yes | No | Yes | Yes | Yes | 6 |
| Li 2020 (39) | Yes | Yes | Yes | Yes | No | Yes | Yes | Yes | 7 |
| Cao 2020 (40) | No | Yes | Yes | Yes | No | Yes | Yes | No | 5 |
| Yuan 2020 (41) | No | Yes | Yes | Yes | No | Yes | Yes | Yes | 6 |
| Zeng 2020 (42) | Yes | Yes | No | Yes | No | Yes | Yes | No | 5 |
| Chen 2020 (43) | No | Yes | Yes | Yes | No | Yes | Yes | Yes | 6 |
| Hu 2020 (44) | No | Yes | Yes | Yes | No | Yes | Yes | No | 5 |
| Zhang 2020 (45) | No | Yes | Yes | Yes | No | Yes | Yes | Yes | 6 |
| Yang 2020 (46) | No | Yes | Yes | Yes | No | Yes | Yes | Yes | 6 |
| Xia 2020 (47) | No | Yes | No | Yes | No | Yes | Yes | Yes | 5 |
| Liu 2020 (48) | No | Yes | No | Yes | No | Yes | Yes | No | 4 |
| Li 2020 (49) | No | Yes | Yes | Yes | No | Yes | Yes | Yes | 6 |
| Shi 2020 (50) | No | Yes | Yes | Yes | No | Yes | Yes | Yes | 6 |
| Lei 2020 (51) | No | Yes | Yes | Yes | No | Yes | Yes | Yes | 6 |
| Sun 2020 (52) | Yes | Yes | Yes | Yes | No | Yes | Yes | Yes | 7 |
| Bai 2020 (53) | No | Yes | Yes | Yes | No | Yes | Yes | No | 5 |
| Chen 2020 (54) | No | Yes | Yes | Yes | No | Yes | Yes | Yes | 6 |
| Zhong 2020 (55) | No | Yes | Yes | Yes | No | Yes | Yes | Yes | 6 |
| Zhu 2020 (56) | No | Yes | No | Yes | No | Yes | Yes | Yes | 5 |
| Li 2020 (57) | Yes | Yes | Yes | Yes | No | Yes | Yes | Yes | 7 |
| Zhang 2020 (58) | No | Yes | Yes | Yes | No | Yes | Yes | No | 5 |
| Zhang 2020 (59) | No | Yes | Yes | Yes | No | Yes | Yes | No | 5 |
| Xia 2020 (60) | No | Yes | Yes | Yes | No | Yes | Yes | Yes | 6 |
| Zhen 2020 (61) | No | Yes | Yes | Yes | No | Yes | Yes | Yes | 6 |
| Sun 2020 (62) | No | Yes | Yes | Yes | No | Yes | Yes | No | 5 |
| Sun 2020 (63) | Yes | Yes | Yes | Yes | No | Yes | Yes | Yes | 7 |
| Xun 2020 (64) | Yes | Yes | Yes | Yes | No | Yes | Yes | Yes | 7 |
| Tian 2020 (65) | No | Yes | Yes | Yes | No | Yes | Yes | No | 5 |
| Chen 2020 (66) | No | Yes | Yes | Yes | No | Yes | Yes | No | 5 |
| Ying 2020 (67) | No | Yes | Yes | Yes | No | Yes | Yes | No | 5 |
| Yu 2020 (68) | No | Yes | Yes | Yes | No | Yes | Yes | Yes | 6 |
| Cui 2020 (69) | No | Yes | Yes | Yes | No | Yes | Yes | Yes | 6 |
| Shang 2020 (70) | No | Yes | Yes | Yes | No | Yes | Yes | No | 5 |
| Shao 2020 (71) | Yes | No | Yes | Yes | No | Yes | Yes | Yes | 6 |
| Wang 2020 (72) | No | Yes | Yes | No | No | Yes | Yes | No | 4 |
| Tian 2020 (73) | No | Yes | Yes | Yes | No | Yes | Yes | Yes | 6 |
| Xu 2020 (74) | Yes | Yes | Yes | Yes | No | Yes | Yes | Yes | 7 |
| Zhu 2020 (75) | Yes | Yes | Yes | Yes | No | Yes | Yes | Yes | 7 |
| Huang 2020 (76) | Yes | Yes | Yes | Yes | No | Yes | Yes | Yes | 7 |
| Jiang 2020 (77) | No | Yes | Yes | Yes | No | Yes | Yes | Yes | 6 |
| Xu 2020 (78) | Yes | Yes | Yes | Yes | No | Yes | Yes | Yes | 7 |
| Husain 2020 (24) | No | Yes | Yes | Yes | No | Yes | Yes | Yes | 6 |
| Huang 2020 (79) | No | Yes | Yes | Yes | No | Yes | Yes | Yes | 6 |
| Huang 2020 (80) | No | Yes | Yes | Yes | Yes | Yes | Yes | Yes | 7 |
| Ng 2020 (2) | No | Yes | Yes | Yes | No | Yes | Yes | Yes | 6 |
| Lauer 2020 (81) | No | Yes | Yes | Yes | No | Yes | Yes | Yes | 6 |
| Xie 2020 (82) | Yes | Yes | Yes | Yes | No | Yes | Yes | Yes | 7 |
| Shi 2020 (83) | No | Yes | Yes | Yes | No | Yes | Yes | Yes | 6 |
| Deng 2020 (86) | Yes | Yes | Yes | Yes | No | Yes | Yes | Yes | 7 |
| Hua 2020 (87) | No | Yes | Yes | Yes | No | Yes | Yes | Yes | 6 |
| Lu 2020 (88) | No | No | Yes | Yes | No | Yes | Yes | No | 4 |
| Shen 2020 (89) | No | Yes | Yes | Yes | No | Yes | Yes | Yes | 6 |
| Tian 2020 (90) | Yes | Yes | Yes | Yes | No | Yes | Yes | Yes | 7 |
| Shi 2020 (91) | No | Yes | Yes | Yes | No | Yes | Yes | Yes | 6 |
| Hung 2020 (92) | Yes | Yes | Yes | No | No | Yes | Yes | Yes | 6 |
| Jung 2020 (21) | Yes | Yes | Yes | Yes | No | Yes | Yes | No | 6 |
| Zhao 2020 (93) | No | Yes | Yes | Yes | No | Yes | Yes | Yes | 6 |
| Yu 2020 (95) | No | Yes | Yes | Yes | No | Yes | Yes | Yes | 6 |
| Hong 2020 (22) | No | Yes | Yes | Yes | No | Yes | Yes | Yes | 6 |
| Xia 2020 (97) | No | Yes | No | Yes | No | Yes | Yes | Yes | 5 |
| Miao 2020 (98) | Yes | Yes | Yes | Yes | No | Yes | Yes | Yes | 7 |
| Dreher 2020 (23) | No | Yes | Yes | No | No | Yes | Yes | Yes | 5 |
| Huang 2020 (99) | Yes | Yes | Yes | Yes | No | Yes | Yes | Yes | 7 |
| Imai 2020 (25) | Yes | Yes | Yes | Yes | No | Yes | Yes | Yes | 7 |
| Ho 2020 (100) | Yes | Yes | Yes | Yes | No | Yes | Yes | Yes | 7 |
| Wang 2020 (101) | Yes | Yes | Yes | Yes | No | Yes | Yes | Yes | 7 |
| Zeng 2020 (102) | No | Yes | Yes | Yes | No | Yes | Yes | No | 5 |
| Zou 2020 (103) | No | Yes | Yes | Yes | No | Yes | Yes | Yes | 6 |
| Ding 2020 (104) | No | Yes | No | Yes | No | Yes | Yes | No | 4 |
| Li 2020 (105) | No | Yes | Yes | Yes | No | Yes | Yes | No | 5 |
| Wu 2020 (106) | No | Yes | Yes | Yes | No | Yes | Yes | Yes | 6 |
| Wang 2020 (107) | No | Yes | Yes | Yes | No | Yes | Yes | Yes | 6 |
| Zhai 2020 (108) | No | Yes | Yes | Yes | No | Yes | Yes | Yes | 6 |
| Tian 2020 (109) | No | Yes | Yes | Yes | No | Yes | Yes | No | 5 |
| Yu 2020 (110) | No | Yes | Yes | Yes | No | Yes | Yes | No | 5 |
| Tian 2020 (111) | No | Yes | Yes | Yes | No | Yes | Yes | No | 5 |
| Shang 2020 (112) | No | Yes | Yes | Yes | No | Yes | Yes | Yes | 6 |
| Zeng 2020 (113) | No | Yes | Yes | Yes | No | Yes | Yes | Yes | 6 |
| Hong 2020 (114) | No | Yes | Yes | Yes | No | Yes | Yes | Yes | 6 |
| Wang 2020 (115) | No | Yes | Yes | Yes | No | Yes | Yes | Yes | 6 |
| Lin 2020 (116) | No | Yes | Yes | Yes | No | Yes | Yes | No | 5 |
| Tu 2020 (117) | No | Yes | Yes | Yes | No | Yes | Yes | Yes | 6 |
| Liu 2020 (118) | No | Yes | Yes | Yes | No | Yes | Yes | Yes | 6 |
| Chen 2020 (119) | No | Yes | Yes | Yes | No | Yes | Yes | Yes | 6 |
| Chen 2020 (120) | No | Yes | Yes | Yes | No | Yes | Yes | Yes | 6 |
| Yao 2020 (121) | No | Yes | Yes | Yes | No | Yes | Yes | No | 5 |
| Zhang 2020 (122) | Yes | No | Yes | Yes | No | Yes | Yes | Yes | 6 |
| Duan 2020 (123) | No | Yes | Yes | Yes | No | Yes | Yes | Yes | 6 |
| LEUNG 2020 (124) | Yes | Yes | Yes | Yes | No | Yes | Yes | Yes | 7 |
| Luo 2020 (11) | No | Yes | Yes | Yes | No | Yes | Yes | Yes | 6 |
| Matthieu 2020 (125) | Yes | Yes | Yes | Yes | Yes | No | Yes | No | 6 |

††, according to the methodology evaluation tool recommended by National Institute for Health and Care Excellence. The risk of bias is evaluated according to eight criteria. The results were summarized by scoring method, for the “Yes” items, the score was 1, and for the “no” items, the score was 0. The maximum score is 8; the higher the score, the lower the risk of bias. The numbers 1 to 8 refer to the items of the tool: 1. case series collected in more than one centre, i.e., multi-centre study; 2. is the hypothesis/aim/objective of the study clearly described? 3. are the inclusion and exclusion criteria (case definition) clearly reported? 4. is there a clear definition of the outcomes reported? 5. were data collected prospectively? 6. is there an explicit statement that patients were recruited consecutively? 7. are the main findings of the study clearly described? 8. are outcomes stratified? (e.g., by disease stage, abnormal test results, patient characteristics).

**Table S2** Cohort study

| Study ID | Selection | | | |  | Comparability |  | Exposure | | | Scores††† |
| --- | --- | --- | --- | --- | --- | --- | --- | --- | --- | --- | --- |
| Item1 | Item2 | Item3 | Item4 |  | Item5 |  | Item6 | Item7 | Item8 |
| Hu 2020 (84) | * |  | * |  |  | * |  | * |  |  | 4 |
| Liang 2020 (85) | * | * | * | * |  | ** |  | * |  |  | 7 |
| Qi 2020 (94) | * | * | * |  |  | ** |  | * |  |  | 6 |
| Zhou 2020 (96) | * | * | * |  |  | ** |  | * |  |  | 6 |
| Young 2020 (20) | * | * | * | * |  | ** |  | * |  | * | 8 |
| Matthew 2020 (126) | * |  | * | * |  | * |  | * | * |  | 6 |

†††, according to the methodology evaluation tool of Newcastle-Ottawa Scale. It consists of eight domains, for each, we will grade with stars. The more stars, the lower the risk of bias. The maximum score is 9. A study can be awarded a maximum of one star for each numbered item within the Selection and Exposure categories. A maximum of two stars can be given for Comparability. The numbers 1 to 8 refer to the items of the tool: 1. representativeness of the exposed cohort; 2. selection of the non-exposed cohort; 3. ascertainment of exposure; 4. demonstration that outcome of interest was not present at start of study; 5. comparability of cohorts on the basis of the design or analysis; 6. assessment of outcome; 7. was follow-up long enough for outcomes to occur; 8. adequacy of follow up of cohorts.
