# Supplementary material for: Did Patients With COVID-19 Receive Timely Treatment in the Early Epidemic? A Systematic Review and Meta-analysis
Source: Research Square preprint supplement (doi:10.21203/rs.3.rs-514728/v1), 2021-05-26
Supplement: Supplementary file 4 [file 7a0c3c2ead4d48a015813795.docx]

**Supplementary II**

**Table** Characteristics of included articles.

| **Study ID** | **Study location** | **Study type** | **Time** | **Sample size** | **Sex (%,man)** | **Age (year)** |
| --- | --- | --- | --- | --- | --- | --- |
| Gao 2020 (25) | Shanxi | Case series | 2020/01/21-2020/02/18 | 40 | 19 (47.5) | 41.0±16.4* |
| Fu 2020 (26) | Chongqing | Case series | 2020/01/21-2020/02/25 | 51 | 27 (52.9) | 60.9±14.9* |
| liu 2020 (27) | Hunan | Case series | 2020/01/21-2020/02/13 | 697 | / | / |
| Liu 2020 (28) | Wuhan | Case series | To 2020/03/11 | 47 | 32 (68.1) | / |
| Huang 2020 (29) | Wuhan | Case series | 2019/12/29-2020/02/27 | 305 | 167 (54.8) | 54.5±14.4* |
| Liu 2020 (30) | Guangdong | Case series | 2020/01/01-2020/03/31 | 73 | 37 (0.5) | 52.2±15.6* |
| Liu 2020 (31) | Henan | Case series | To 2020/02/08 | 15 | 10 (66.7) | 46.5* |
| Han 2020 (32) | Wuhan | Case series | 2020/01/12-2020/02/16 | 120 | 63 (52.5) | 53.0±14.0* |
| Yu 2020 (33) | Beijing | Case series | 2020/01/21-2020/02/25 | 50 | 32 (64.0) | 40.0±18.4* |
| Xia 2020 (34) | Hunan | Case series | From 2020/01/16 | 33 | 19 (57.6) | 39.0** |
| Chen 2020 (35) | Hainan | Case series | 2020/01/22-2020/03/04 | 168 | 81 (48.2) | 51.0** |
| Ye 2020 (36) | Wuhan | Case series | 2020/02/15-2020/02/25 | 55 | 29 (52.7) | 59±13.1* |
| Yang 2020 (37) | Jiangsu | Case series | / | 57 | 29 (50.9) | 37.0** |
| Li 2020 (38) | Henan | Case series | 2020/01/21-2020/02/24 | 256 | 159 (62.1) | / |
| Cao 2020 (39) | Chongqing | Case series | 2020/01/24-2020/02/23 | 223 | 105 (47.2) | 46.5±16.1* |
| Yuan 2020 (40) | Chongqing | Case series | 2020/01/24-2020/02/23 | 223 | 106 (47.5) | 46.5±16.1* |
| Zeng 2020 (41) | Chongqing | Case series | 2020/01/21-2020/02/25 | 353 | 193 (54.7) | 46.3* |
| Chen 2020 (42) | Fujian | Case series | / | 111 | 57 (51.4) | 49.5** |
| Hu 2020 (43) | Hunan | Case series | 2020/01/01-2020/02/08 | 852 | 460 (51.8) | 44.0** |
| Zhang 2020 (44) | Hubei | Case series | 2020/02/06-2020/03/07 | 120 | 73 (60.8) | / |
| Yang 2020 (45) | Hubei | Case series | 2020/01/30-2020/03/21 | 40 | 22 (55.0) | 51.2* |
| Xia 2020 (46) | Wuhan | Case series | 2020/01/24-2020/02/19 | 110 | 44 (40.0) | / |
| Liu 2020 (47) | Shanxi | Case series | 2020/01/23-2020/03/02 | 245 | 131 (53.5) | 46.2* |
| Li 2020 (48) | Liaoning | Case series | 2020/01/26-2020/02/29 | 26 | 14 (53.9) | 43.9±11.9* |
| Shi 2020 (49) | Zhejiang | Case series | 2020/01/17-2020/01/29 | 65 | 37 (57.0) | 42.0** |
| Lei 2020 (50) | Wuhan | Case series | 2020/01/10-2020/01/30 | 51 | 25 (49.0) | 55.0** |
| Sun 2020 (51) | Henan | Case series | 2020/01/24-2020/02/26 | 129 | 59 (45.7) | 45.0** |
| Bai 2020 (52) | Shanxi | Case series | 2020/01/01-2020/03/06 | 120 | 63 (52.5) | 49.4±18.2* |
| Chen 2020 (53) | Jiangsu | Case series | 2019/12/01-2020/03/01 | 30 | 17 (56.7) | 48.9±13.1* |
| Zhong 2020 (54) | Hainan | Case series | 2020/01/21-2020/02/10 | 62 | 40 (64.5) | 51.8±13.5* |
| Zhu 2020 (55) | Anhui | Case series | 2020/01/18-2020/03/08 | 79 | 44 (55.7) | 56.1±12.7* |
| Li 2020 (56) | Hubei | Case series | 2020/01/21-2020/03/02 | 193 | 112 (58.0) | 50.7±16.2* |
| Zhang 2020 (57) | Anhui | Case series | 2020/01/23-2020/02/15 | 36 | 20 (55.6) | (8,75)*** |
| Zhang 2020 (58) | Wuhan | Case series | 2020/01/19-2020/02/08 | 10 | 7 (70.0) | 74.5** |
| Xia 2020 (59) | Wuhan | Case series | 2020/01/15-2020/02/08 | 52 | 23 (44.2) | 54.0±12.8* |
| Zhen 2020 (60) | Wuhan | Case series | 2020/01/01-2020/02/01 | 71 | 35 (49.3) | 62.0 (53.5, 70.0)** |
| Sun 2020 (61) | Wuhan | Case series | 2020/02/09-2020/02/27 | 51 | 27 (52.9) | 68.0* |
| Sun 2020 (62) | Henan | Case series | 2020/01/24-2020/02/16 | 150 | 67 (44.7) | 45.0±16.0* |
| Xun 2020 (63) | Zhejiang | Case series | 2020/01/10-2020/01/26 | 62 | 35 (56.5) | 41.0 (32.0, 52.0)** |
| Tian 2020 (64) | Hubei | Case series | 2020/01/13-2020/02/13 | 25 | 11 (44.0) | 38.0** |
| Chen 2020 (65) | Guangdong | Case series | 2020/01/11-2020/02/02 | 12 | 8 (66.7) | 63.0* |
| Ying 2020 (66) | Wuhan | Case series | 2020/01/31-2020/02/10 | 95 | 34 (35.8) | 35.0** |
| Yu 2020 (67) | Beijing | Case series | From 2020/01/21 | 40 | 26 (65.0) | 39.9±18.2* |
| Cui 2020 (68) | Gansu | Case series | / | 8 | 5 (62.5) | 40.1* |
| Shang 2020 (69) | Anhui | Case series | 2020/01/22-2020/02/19 | 36 | 21 (58.3) | 38.6±10.6* |
| Shao 2020 (70) | Zhejiang | Case series | 2020/01/17-2020/02/12 | 788 | 407 (51.6) | 46.0 (35.0, 55.8)** |
| Wang 2020 (71) | Shandong | Case series | 2020/01/31-2020/02/12 | 26 | 11 (42.3) | 42.0 (34.0, 53.0)** |
| Tian 2020 (72) | Shandong | Case series | / | 37 | 17 (45.9) | 44.3±16.7* |
| Xu 2020 (73) | Zhejiang | Case series | 2020/01/13-2020/02/19 | 113 | 66 (58.4) | 52.0 (43.0, 63.0)** |
| Zhu 2020 (74) | Anhui | Case series | 2020/01/24-2020/02/20 | 116 | 56 (48.3) | 40.0 (27.0, 53.0)** |
| Huang 2020 (75) | Hunan | Case series | 2020/01/17-2020/02/10 | 54 | 28 (51.9) | 41.0 (31.0, 51.0)** |
| Jiang 2020 (76) | Zhejiang | Case series | 2020/01/16-2020/01/31 | 60 | 35 (58.3) | 41.0** |
| Xu 2020 (77) | Zhejiang | Case series | 2020/01/10-2020/02/26 | 62 | 35 (56.5) | 41.0 (32.0, 52.0)** |
| Husain 2020 (23) | The United States | Case series | 2020/03/13-2020/04/06 | 41 | 30 (73.2) | 49.0 (41.0, 63.0)** |
| Huang 2020 (78) | Hubei | Case series | 2020/01/25-2020/03/24 | 299 | 160 (53.5) | 53.4±16.7* |
| Huang 2020 (79) | Wuhan | Case series | 2019/12/16-2020/01/02 | 41 | 30 (73.2) | 49.0 (41.0, 58.0)** |
| Ng 2020 (2) | Singapore | Case series | 2020/01/02-2020/02/29 | 100 | 60 (60.0) | 42.5* |
| Lauer 2020 (80) | Outside of Hubei | Case series | 2020/01/04-2020/02/24 | 181 | 108 (59.7) | 44.5 (34.0, 55.5)** |
| Xie 2020 (81) | Shanghai | Case series | 2020/01/01-2020/02/15 | 105 | 54 (51.4) | 44.1±18.1* |
| Shi 2020 (82) | Shanghai | Case series | 2020/01/20-2020/02/07 | 184 | 99 (53.8) | 49.0±15.0* |
| Hu 2020 (83) | Shandong | Cohort study | 2020/01/29-2020/03/12 | 59 | 28 (47.5) | 46.0 (33.0, 57.0)** |
| Liang 2020 (84) | China | Cohort study | 2019/11/21-2020/01/31 | 1590 | 904 (57.3) | 48.9±16.3* |
| Deng 2020 (85) | Wuhan | Case series | 2020/01/01-2020/02/21 | 225 | 124 (55.1) | / |
| Hua 2020 (86) | Wuhan | Case series | 2020/02/07-2020/02/26 | 205 | 112 (54.6) | 51.0 (39.0, 57.0)** |
| Lu 2020 (87) | Jiangsu | Case series | 2020/01/23-2020/02/26 | 28 | 17 (60.7) | 48.3±13.5* |
| Shen 2020 (88) | Shanghai | Case series | 2020/01/20-2020/02/29 | 325 | 168 (51.7) | 50.0* |
| Tian 2020 (89) | Beijing | Case series | 2020/01/20-2020/02/10 | 262 | 127 (48.5) | 47.5 (45.1, 49.9)** |
| Shi 2020 (90) | Wuhan | Case series | 2020/01/20-2020/02/10 | 416 | 205 (49.3) | 64.0 (21.0, 95.0)** |
| Hung 2020 (91) | Hongkong | Case series | 2020/02/10-2020/03/20 | 127 | 68 (53.5) | 52.0 (32.0, 62.0)** |
| Jung 2020 (20) | South Korea | Case series | 2020/02/01-2020/04/01 | 14 | 6 (42.9) | 63.5±14.5* |
| Zhao 2020 (92) | Hubei | Case series | 2020/01/16-2020/02/17 | 136 | 68 (50.0) | 49.0 (33.0, 63.0)** |
| Qi 2020 (93) | Guangdong | Cohort study | 2020/01/24-2020/03/08 | 147 | 80 (54.4) | 42.0 (35.0, 54.0)** |
| Yu 2020 (94) | Wuhan | Case series | 2020/02/13-2020/02/28 | 129 | 56 (43.4) | 64.0 (56.0, 69.0)** |
| Zhou 2020 (95) | Wuhan | Cohort study | 2020/01/15-2020/03/15 | 238 | 102 (42.9) | 55.5 (35.0, 67.3)** |
| Hong 2020 (21) | South Korea | Case series | To 2020/03/29 | 98 | 38 (38.8) | 55.4±17.1* |
| Xia 2020 (96) | Wuhan | Case series | 2020/02/04-2020/03/30 | 1568 | 797 (50.8) | 63.0 (55.0, 71.0)** |
| Miao 2020 (97) | Shanghai | Case series | 2020/01/12-2020/02/13 | 54 | 28 (51.9) | 45.1±13.4* |
| Dreher 2020 (22) | Germany | Case series | 2020/02/01-2020/03/01 | 50 | 33 (66.0) | 65.0 (58.0, 76.0)** |
| Huang 2020 (98) | Jiangsu | Case series | 2020/01/22-2020/02/10 | 202 | 116 (57.4) | 44.0 (33.0, 54.0)** |
| Imai 2020 (24) | Japan | Case series | 2020/02/11-2020/03/31 | 112 | 64 (57.1) | 67.0 (45.0, 74.0)** |
| Ho 2020 (99) | Hongkong | Case series | 2020/01/23-2020/05/31 | 1084 | 588 (54.2) | 37.5* |
| Wang 2020 (100) | Wuhan | Case series | To 2020/02/10 | 107 | 57 (53.3) | 51.0 (36.0, 65.0)** |
| Zeng 2020 (101) | Sichuan | Case series | 2020/01/16-2020/02/05 | 20 | 12 (60) | 57.4±16.5* |
| Zou 2020 (102) | Wuhan | Case series | 2020/01/01-2020/01/29 | 15 | 10 (66.7) | 61.7±9.6* |
| Ding 2020 (103) | Wuhan | Case series | 2020/01/01-2020/02/03 | 56 | 30 (53.6) | 54.6±15.5* |
| Li 2020 (104) | Henan | Case series | 2020/01/20-2020/02/17 | 40 | 20 (50.0) | 50.9* |
| Wu 2020 (105) | Hubei | Case series | 2020/01/01-2020/03/22 | 102 | 75 (73.5) | 51.6±19.3* |
| Wang 2020 (106) | Wuhan | Case series | 2020/01/20-2020/02/14 | 96 | 46 (47.9) | / |
| Zhai 2020 (107) | Anhui | Case series | 2020/01/22-2020/03/04 | 74 | 41 (55.4) | 54.9±11.8* |
| Tian 2020 (108) | Jiangsu | Case series | 2020/01/23-2020/02/16 | 23 | 10 (43.5) | 49.7±13.1* |
| Yu 2020 (109) | Wuhan | Case series | 2020/12/18-2020/01/29 | 608 | 398 (65.5) | 60.2±8.7* |
| Tian 2020 (110) | Jiangsu | Case series | 2020/01/23-2020/02/10 | 26 | 14 (53.9) | 47.9±13.1* |
| Shang 2020 (111) | Anhui | Case series | 2020/01/22-2020/02/19 | 36 | 21 (58.3) | 38.6±10.6* |
| Zeng 2020 (112) | Hunan | Case series | 2020/01/24-2020/02/19 | 79 | 41 (51.9) | 45.9±12.7* |
| Hong 2020 (113) | Guangdong | Case series | 2020/01/17-2020/03/01 | 18 | 9 (50.0) | 63.5 (51.5, 67.5)** |
| Wang 2020 (114) | Wuhan | Case series | 2020/01/10-2020/02/08 | 312 | 145 (46.5) | 52.0 (42.0, 62.0)** |
| Lin 2020 (115) | Zhejiang | Case series | 2020/01/15-2020/02/05 | 71 | 22 (31.0) | 50.3±14.6* |
| Tu 2020 (116) | Wuhan | Case series | 2020/01/10-2020/02/29 | 75 | 53 (70.7) | 68.0 (62.0, 74.0)** |
| Liu 2020 (117) | Wuhan | Case series | 2020/01/16-2020/02/15 | 64 | 23 (35.9) | 35.0 (29.0, 43.0)** |
| Chen 2020 (118) | Guangdong | Case series | 2020/01/20-2020/03/15 | 284 | 131 (46.1) | 48.0 (33.0, 62.0)** |
| Chen 2020 (119) | Wuhan | Case series | 2020/01/01-2020/03/02 | 30 | 14 (46.7) | 60.5 (32.0, 77.0)** |
| Yao 2020 (120) | Wuhan | Case series | 2020/01/26-2020/02/18 | 55 | 37 (67.3) | 70.7±13.5* |
| Zhang 2020 (121) | Wuhan | Case series | 2020/01/20-2020/02/29 | 564 | 286 (50.7) | 60.0 (48.0, 67.0)** |
| Duan 2020 (122) | Wuhan | Case series | 2020/01/01-2020/01/31 | 116 | 58 (50.0) | 62.5 (55, 68.3)** |
| LEUNG 2020 (123) | Hongkong | Case series | 2020/01/26-2020/02/28 | 50 | 23 (46.0) | 55.2±19.5* |
| Luo 2020 (11) | Wuhan | Case series | 2020/01/30-2020/02/25 | 403 | 193 (47.9) | 56.0 (39.0, 68.0)** |
| Young 2020 (19) | Singapore | Cohort study | 2020/01/22-2020/03/06 | 100 | 56 (56.0) | 46.0* |
| Matthieu 2020 (125) | French | Case series | 2020/03/12-2020/03/31 | 173 | 125 (72.3) | 60.0 (52.0, 68.0)** |
| Matthew 2020 (126) | The United States | Cohort study | 2020/03/02-2020/04/01 | 257 | 171 (66.5) | 62.0 (51.0, 72.0)** |

*, mean SD; **, median(IQR); ***, range; /, not report.
